# Supplementary material for: Molecular Mapping of Quantitative Trait Loci for Fusarium Head Blight Resistance in the Brazilian Spring Wheat Cultivar “Surpresa”
Source: Front Plant Sci. 2022 Jan 24;12:778472. doi: 10.3389/fpls.2021.778472 (PMC8818699; doi:10.3389/fpls.2021.778472)
Supplement: Supplementary file 2 [file Table_1.XLSX]

## Sheet: Sheet1
Supplementary Table 1. Summary of genetic linkage maps obtained from the Wheaton/Surpresa bi-parental mapping population using the two-enzyme GBS approach.
Chromosome	#SNPs	Length (cM)	SNP density (SNPs/cM)
1A	319	232.855	1.37
1B	479	301.569	1.59
1D	124	148.524	0.83
2A	338	189.221	1.79
2B	380	269.83	1.41
2D	34	50.285	0.68
3A	210	180.022	1.17
3B	547	293.574	1.86
3D	64	35.488	1.8
4A	295	261.431	1.13
4B	61	53.231	1.15
4D	11	37.492	0.29
5A	319	329.205	0.97
5B	330	230.279	1.43
5D	62	23.178	2.67
6A	246	167.007	1.47
6B	506	344.742	1.47
6D	32	19.964	1.6
7A	466	404.63	1.15
7B	508	262.371	1.94
7D	39	140.353	0.28
Total	5370	3975.25	1.35086
